# Supplementary material for: Spatial transcriptome analysis provides insights of key gene(s) involved in steroidal saponin biosynthesis in medicinally important herb Trillium govanianum
Source: PubMed Central journal article supplement (PMC5368571; doi:10.1038/srep45295), 2017-03-28
Supplement: srep45295-s1.pdf [file srep45295-s1.pdf]

## **Supplementary Information: SREP-16-41203**

### **Spatial transcriptome analysis provides insights of key gene(s) involved in steroidal saponin biosynthesis in medicinally important herb *Trillium govanianum***

Pradeep Singh, Gagandeep Singh, Abhishek Bhandawat, Gopal Singh, Rajni Parmar, Romit Seth, Ram Kumar Sharma\*

Biotechnology Department, CSIR-Institute of Himalayan Bioresource Technology, Palampur, Himachal Pradesh, India, 176061

#### **\*Correspondence:**

Dr Ram Kumar Sharma  
Biotechnology Division  
CSIR-Institute of Himalayan Bioresource Technology  
Palampur (H.P)  
India  
Email: rksharma.ihbt@gmail.com, ramsharma@ihbt.res.in

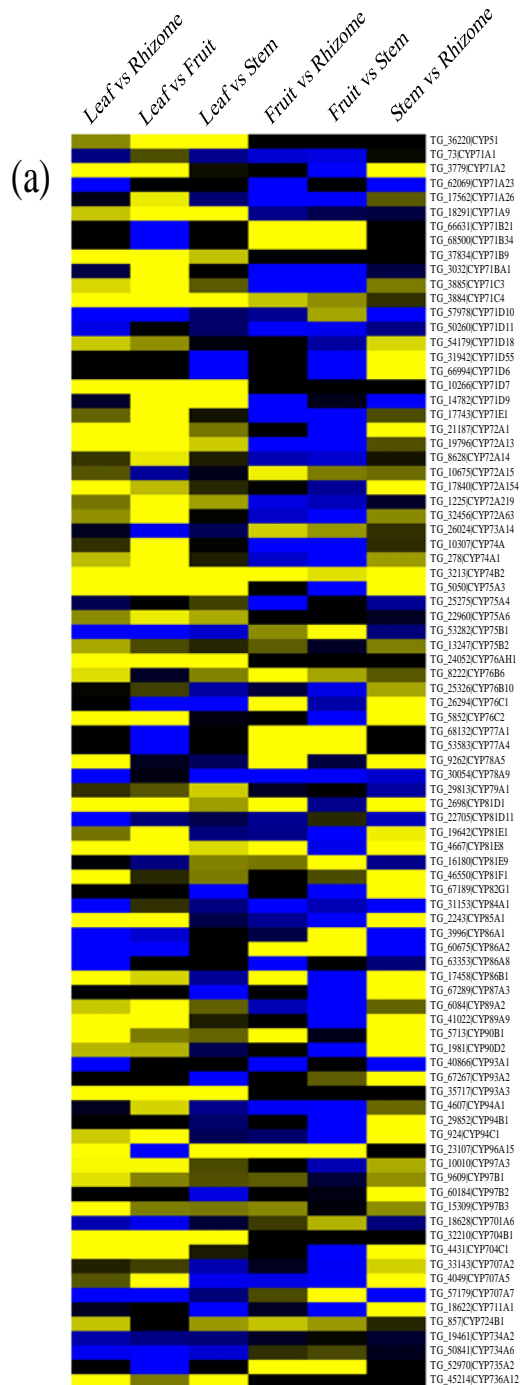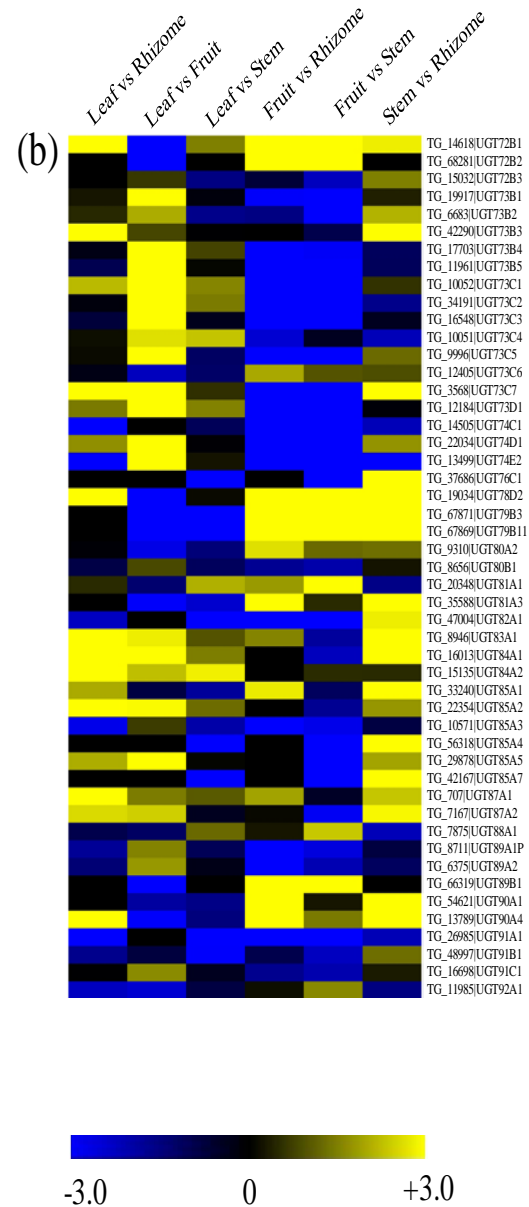

Figure S1

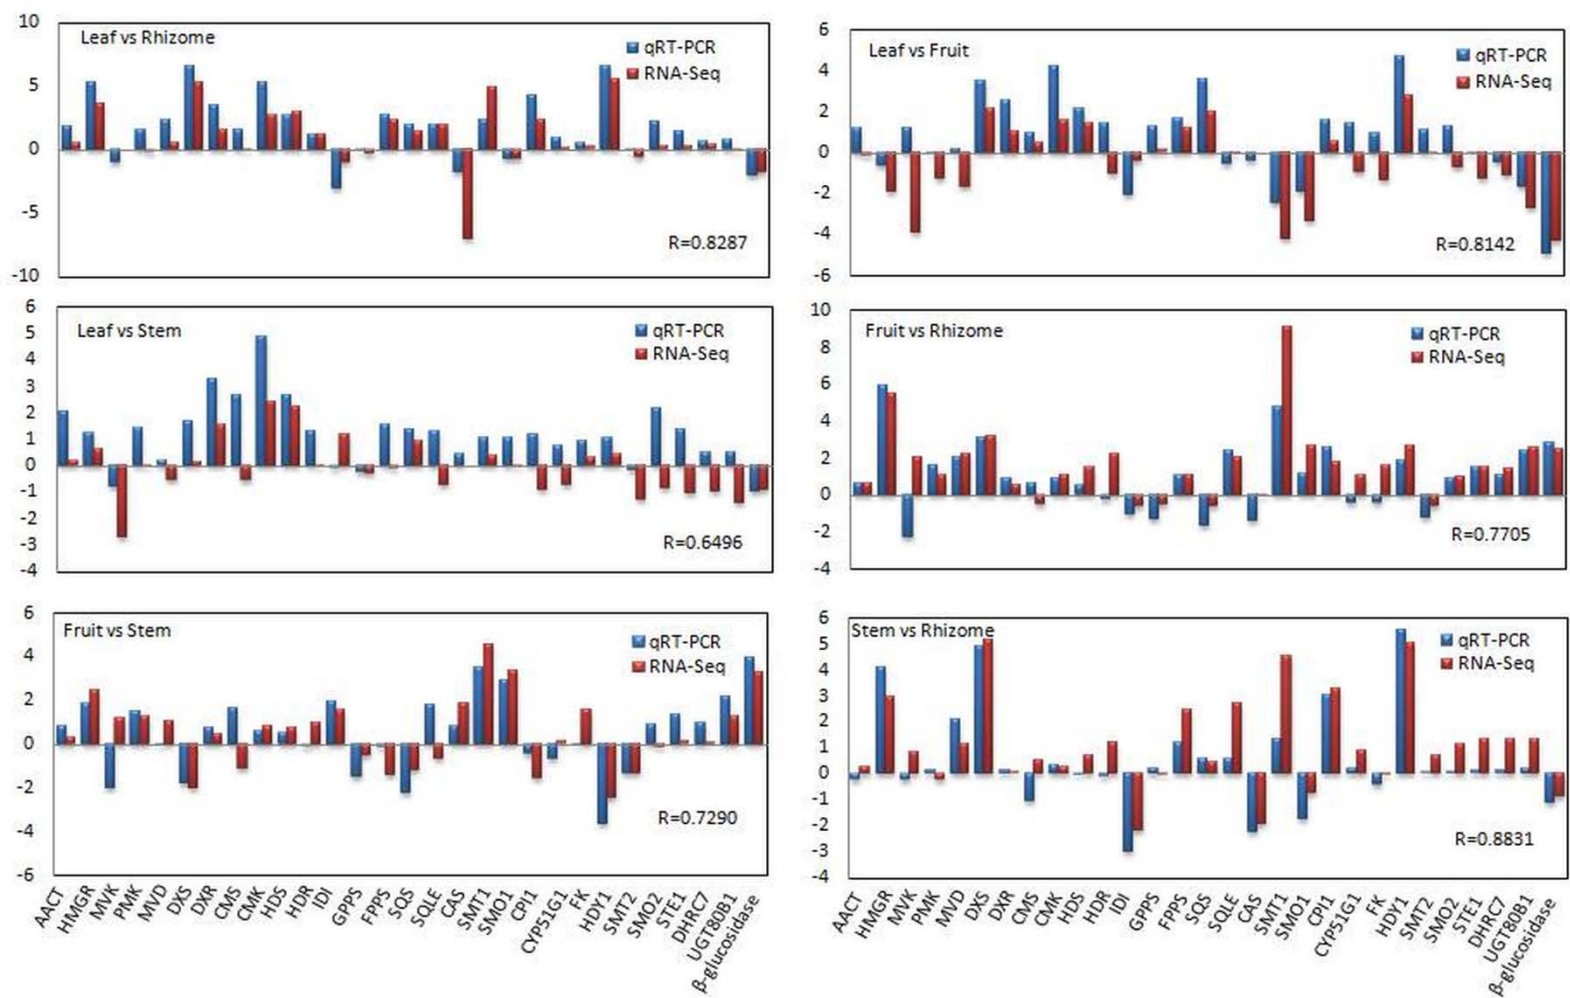

Figure S2

**Supplementary Table S1: Summary of *de novo* assembly generated from *T. govianianum*.**

| <b>Categories</b>              | <b>Characteristics</b> |
|--------------------------------|------------------------|
| Number of paired-end raw reads | 173,974,146            |
| N50 length                     | 412                    |
| Minimum length (bp)            | 174                    |
| Maximum length (bp)            | 35,947                 |
| Average length (bp)            | 401                    |
| Total Contigs                  | 69,174                 |

**Supplementary Table S3: Classification and number of transcripts related to transcription factors families.**

| S. No. | Family      | Genes | Transcripts | S. No. | Family   | Genes | Transcripts |
|--------|-------------|-------|-------------|--------|----------|-------|-------------|
| 1.     | bHLH        | 250   | 1036        | 39.    | CAMTA    | 24    | 46          |
| 2.     | MYB_related | 188   | 662         | 40.    | NF-X1    | 9     | 45          |
| 3.     | NAC         | 155   | 628         | 41.    | CO-like  | 23    | 40          |
| 4.     | FAR1        | 125   | 559         | 42.    | CPP      | 16    | 40          |
| 5.     | bZIP        | 147   | 516         | 43.    | BBR-BPC  | 14    | 37          |
| 6.     | B3          | 82    | 499         | 44.    | SRS      | 8     | 37          |
| 7.     | WRKY        | 128   | 484         | 45.    | EIL      | 14    | 34          |
| 8.     | C2H2        | 166   | 415         | 46.    | ARR-B    | 25    | 33          |
| 9.     | ERF         | 140   | 410         | 47.    | DBB      | 15    | 33          |
| 10.    | C3H         | 180   | 403         | 48.    | ZF-HD    | 16    | 27          |
| 11.    | MYB         | 128   | 386         | 49.    | LSD      | 11    | 25          |
| 12.    | G2-like     | 83    | 276         | 50.    | VOZ      | 7     | 23          |
| 13.    | GRAS        | 89    | 243         | 51.    | HRT-like | 6     | 19          |
| 14.    | HD-ZIP      | 79    | 213         | 52.    | GRF      | 14    | 18          |
| 15.    | M-type      | 44    | 181         | 53.    | RAV      | 7     | 16          |
| 16.    | Trihelix    | 65    | 176         | 54.    | Whirly   | 7     | 15          |
| 17.    | GATA        | 52    | 173         | 55.    | HB-PHD   | 3     | 7           |
| 18.    | TCP         | 34    | 158         | 56.    | LFY      | 1     | 1           |
| 19.    | HB-other    | 45    | 156         | 57.    | NZZ/SPL  | 1     | 1           |
| 20.    | HSF         | 44    | 143         | 58.    | SAP      | 1     | 1           |
| 21.    | NF-YB       | 32    | 136         |        |          |       |             |
| 22.    | ARF         | 69    | 135         |        |          |       |             |
| 23.    | MIKC        | 34    | 134         |        |          |       |             |
| 24.    | TALE        | 41    | 107         |        |          |       |             |
| 25.    | LBD         | 37    | 106         |        |          |       |             |
| 26.    | E2F/DP      | 25    | 103         |        |          |       |             |
| 27.    | YABBY       | 13    | 97          |        |          |       |             |
| 28.    | SIFa-like   | 16    | 89          |        |          |       |             |
| 29.    | GeBP        | 17    | 88          |        |          |       |             |
| 30.    | SBP         | 35    | 87          |        |          |       |             |
| 31.    | Nin-like    | 22    | 78          |        |          |       |             |
| 32.    | Dof         | 34    | 72          |        |          |       |             |
| 33.    | STAT        | 5     | 65          |        |          |       |             |
| 34.    | NF-YA       | 18    | 63          |        |          |       |             |
| 35.    | BES1        | 23    | 62          |        |          |       |             |
| 36.    | NF-YC       | 26    | 62          |        |          |       |             |
| 37.    | WOX         | 13    | 60          |        |          |       |             |
| 38.    | AP2         | 22    | 48          |        |          |       |             |

**Supplementary Table S6. Pathways and number of transcripts related to secondary metabolite biosynthesis in *T. govanianum***

| <b>S. No.</b> | <b>Pathway ID</b> | <b>Secondary metabolites biosynthesis pathways</b>     | <b>KO</b> | <b>Transcripts</b> |
|---------------|-------------------|--------------------------------------------------------|-----------|--------------------|
| 1.            | Ko00254           | Aflatoxin biosynthesis                                 | 1         | 1                  |
| 2.            | Ko00942           | Anthocyanin biosynthesis                               | 1         | 1                  |
| 3.            | Ko00965           | Betalain biosynthesis                                  | 1         | 1                  |
| 4.            | Ko00905           | Brassinosteroid biosynthesis                           | 4         | 4                  |
| 5.            | Ko00524           | Butirosin and neomycin biosynthesis                    | 2         | 3                  |
| 6.            | Ko00332           | Carbapenem biosynthesis                                | 2         | 2                  |
| 7.            | Ko00906           | Carotenoid biosynthesis                                | 14        | 18                 |
| 8.            | Ko00904           | Diterpenoid biosynthesis                               | 7         | 8                  |
| 9.            | Ko00944           | Flavone and flavonol biosynthesis                      | 3         | 4                  |
| 10.           | Ko00941           | Flavonoid biosynthesis                                 | 12        | 13                 |
| 11.           | Ko00966           | Glucosinolate biosynthesis                             | 2         | 2                  |
| 12.           | Ko00901           | Indole alkaloid biosynthesis                           | 2         | 2                  |
| 13.           | Ko00950           | Isoquinoline alkaloid biosynthesis                     | 8         | 9                  |
| 14.           | Ko00261           | Monobactam biosynthesis                                | 6         | 9                  |
| 15.           | Ko00902           | Monoterpenoid biosynthesis                             | 3         | 3                  |
| 16.           | Ko00401           | Novobiocin biosynthesis                                | 3         | 4                  |
| 17.           | Ko00311           | Penicillin and cephalosporin biosynthesis              | 1         | 1                  |
| 18.           | Ko00940           | Phenylpropanoid biosynthesis                           | 18        | 32                 |
| 19.           | Ko00523           | Polyketide sugar unit biosynthesis                     | 1         | 1                  |
| 20.           | Ko00909           | Sesquiterpenoid and triterpenoid biosynthesis          | 2         | 2                  |
| 21.           | Ko00100           | Steroid biosynthesis                                   | 18        | 23                 |
| 22.           | Ko00945           | Stilbenoid, diarylheptanoid and gingerol biosynthesis  | 5         | 8                  |
| 23.           | Ko00521           | Streptomycin biosynthesis                              | 6         | 12                 |
| 24.           | Ko00900           | Terpenoid backbone biosynthesis                        | 33        | 47                 |
| 25.           | Ko00253           | Tetracycline biosynthesis                              | 3         | 3                  |
| 26.           | Ko00960           | Tropane, piperidine and pyridine alkaloid biosynthesis | 9         | 12                 |
| 27.           | Ko00908           | Zeatin biosynthesis                                    | 4         | 7                  |

**Supplementary Table S7: List of expression primer sets of selected transcripts used for Real time-PCR analysis.**

| S. No. | Gene Symbol          | Transcript ID | Forward 5'-3'          | Reverse 5'-3'          |
|--------|----------------------|---------------|------------------------|------------------------|
| 1.     | ACAT                 | TG_1384       | GTGCCCAAATCGAGATCCT    | CTTGCGGCACAGAGTATTCA   |
| 2.     | HMGR                 | TG_7012       | GGACGTGATTAGCATCTCAGG  | TCACCACCTGCTCTTTGATG   |
| 3.     | MVK                  | TG_27721      | TCAGCTGGTGAATAAATGTGCT | GTCTCACCTGACCGGAACAT   |
| 4.     | PMK                  | TG_12165      | CTTTGCCTCCATTGATGACC   | TGTCTCCATGGATCTCTGAGG  |
| 5.     | MVD                  | TG_4239       | CATTAGGCCCTGCATCAAAT   | CAAGCCCGCCAATATTCTAC   |
| 6.     | DXS                  | TG_13335      | TTGGCAAAGGGAGGATACTG   | CATCCCATGCTGCTCTACAA   |
| 7.     | DXR                  | TG_1064       | AGCCGCAATAGAGTCTGGAA   | TCGGAATCAGCTGGCAGTAT   |
| 8.     | CMS                  | TG_22136      | CCCAAAGTGTTCCTGTCTG    | AGAGATGGTTGGCTGAATGG   |
| 9.     | CMK                  | TG_16822      | TGCCTTGTGAGAAAGGAAGC   | TCAGGAAGCGGAAGCACTAT   |
| 10.    | HDS                  | TG_241        | CCATTCAAGGATCTGGCAAC   | GTCAGAACGCCCATGCTTAT   |
| 11.    | HDR                  | TG_29033      | AGCGGAGTCTTACGGGTTCT   | GACGGTTGGGTTGTGGATAA   |
| 12.    | IDI                  | TG_28659      | GCTTTATGCGCCAGTTGAAT   | TCTCACCGCAAACGGAAC     |
| 13.    | GPSS                 | TG_15477      | GTCAACATCGCTTGGGAAAG   | AAGCCACGGTCAACAACCTC   |
| 14.    | FPPS                 | TG_20699      | GGGCAGATGTTGGATTTGAT   | GCAACCGGAAGGTAGAAGG    |
| 15.    | SQS                  | TG_2891       | TTGATGCATGCTGAAGATTG   | TGTAGCATTGCGCTAGTGTTC  |
| 16.    | SQLE                 | TG_10901      | GCCGGTTTCCTCTACGATAA   | ACACCTCCGAGGCTCAGATA   |
| 17.    | CAS                  | TG_61680      | AGCCAATTGTGGGACACAG    | GCCAGGACAGTTGTCAAGAA   |
| 18.    | SMT1                 | TG_12295      | CCAGTGGCAAGTACCATGAA   | ACGGGCTTCCAGACATAAGA   |
| 19.    | SMO1                 | TG_30966      | CCCTTCTATGGAGGTGCAGA   | GCCCTTGTCAGTTCGGTAAA   |
| 20.    | CPI1                 | TG_15731      | ATGAACAATGTGCCTCATGC   | TGATTGTGGTAAGTCAGCAACA |
| 21.    | CYP51G1              | TG_4589       | AGGTGATGGAGCTCGTGTG    | GACGACATGCTCCAATGCT    |
| 22.    | FK                   | TG_15784      | GCACCTCTCCTCGTCTCTTCT  | CTATTGCTCGCGCTTTCATT   |
| 23.    | HDY1                 | TG_1045       | GCCGGTATGATAATCCACGA   | TGGATGCGCTGTTTACTTTG   |
| 24.    | SMT2                 | TG_2945       | ACGATCACGGCAGACAAAGT   | TGTAGAAGGTGTCGACGAAGG  |
| 25.    | SMO2                 | TG_5104       | GAACACTGTGGACGTGCTTG   | TTGCCACACTGGACTGTCAT   |
| 26.    | STE1                 | TG_5587       | AGTTGCGATGAAGGCTATGC   | TACATGGGCCAACCAACTTC   |
| 27.    | DWF5                 | TG_27363      | ATCCCGTAAATCTCGGTTCC   | GGCATTTCCTTTGTTCTG     |
| 28.    | UGT80B1              | TG_9310       | CGGCTCTAAGACCAGCAGAA   | TTGGCAGAACCCAGAGATTC   |
| 29.    | $\beta$ -glucosidase | TG_4604       | CAGCCAGAGGGTTCTCAAAG   | GACGATCTGACTGCCCTTGT   |

The PCR amplification program was as follows: 95°C for 10min; 40 cycles of 95°C for 30s, 58°C for 30s and 72°C for 30s; followed by a melting-curve program of 95°C for 1min, 60°C for 30s and 95°C for 30s.

**Supplementary Table S8: The number of transcripts related to Steroidal Saponin biosynthesis.**

| S. No.                                        | Gene                                                          | Gene Symbol   | KO     | Transcripts |
|-----------------------------------------------|---------------------------------------------------------------|---------------|--------|-------------|
| Terpenoid backbone biosynthesis               | Acetyl-CoA C-acetyltransferase                                | ACAT          | K00626 | 1           |
|                                               | Hydroxymethylglutaryl-CoA synthase                            | HMGS          | K01641 | 2           |
|                                               | Hydroxymethylglutaryl-CoA reductase                           | HMGR          | K00021 | 1           |
|                                               | Mevalonate kinase                                             | MVK           | K00869 | 1           |
|                                               | Phosphomevalonate kinase                                      | PMK           | K00938 | 1           |
|                                               | Diphosphomevalonate decarboxylase                             | MVD           | K01597 | 1           |
|                                               | 1-deoxy-D-xylulose-5-phosphate synthase                       | DXS           | K01662 | 1           |
|                                               | 1-deoxy-D-xylulose-5-phosphate reductoisomerase               | DXR           | K00099 | 1           |
|                                               | 2-C-methyl-D-erythritol 4-phosphate cytidyltransferase        | CMS           | K00991 | 1           |
|                                               | 4-diphosphocytidyl-2-C-methyl-D-erythritol kinase             | CMK           | K00919 | 1           |
|                                               | 2-C-methyl-D-erythritol 2,4-cyclodiphosphate synthase         | MCS           | K01770 | 3           |
|                                               | (E)-4-hydroxy-3-methyl-2-butenyl-diphosphate synthase         | HDS           | K03526 | 5           |
|                                               | 4-hydroxy-3-methylbut-2-enyl diphosphate reductase            | HDR           | K03527 | 3           |
|                                               | Isopentenyl-diphosphate delta-isomerase                       | IDI           | K01823 | 3           |
|                                               | Geranyl diphosphate synthase                                  | GPPS          | K14066 | 1           |
|                                               | Farnesyl diphosphate synthase                                 | FPPS          | K00787 | 1           |
| Sesquiterpenoid and triterpenoid biosynthesis | Squalene synthase                                             | SQS           | K00801 | 1           |
|                                               | Squalene epoxidase                                            | SQLE          | K00511 | 1           |
| Steroidal saponin biosynthesis                | Cycloartenol synthase                                         | CAS           | K01853 | 1           |
|                                               | Sterol 24-C-methyltransferase                                 | SMT1          | K00559 | 1           |
|                                               | 4,4-dimethyl-9beta,19-cyclopropylsterol-4alpha-methyl oxidase | SMO1          | K14423 | 1           |
|                                               | Cycloeucalenolcycloisomerase                                  | CPI1          | K08246 | 1           |
|                                               | Sterol 14-demethylase                                         | CYP51G1       | K05917 | 1           |
|                                               | Delta14-sterol reductase                                      | FK            | K00222 | 1           |
|                                               | Cholesterol Delta-isomerase                                   | HDY1          | K01824 | 2           |
|                                               | 24-methylenesterol C-methyltransferase                        | SMT2          | K08242 | 1           |
|                                               | 4-alpha-methyl-delta7-sterol-4alpha-methyl oxidase            | SMO2          | K14424 | 1           |
|                                               | Lanosterol Oxidase                                            | STE1          | K00227 | 1           |
|                                               | 7-dehydrocholesterol reductase                                | DWF5          | K00213 | 1           |
|                                               | Delta24-sterol reductase                                      | DWF1          | K09828 | 3           |
|                                               | Sterol 3-O-β-D-glucosyltransferase                            | UGT80B1       | K05841 | 1           |
|                                               | β-glucosidase                                                 | β-glucosidase | K05349 | 3           |
|                                               | β-glucosidase                                                 | K01188        | 1      |             |



## Supplementary Figure legends

**Supplementary Figure S1:** Heatmap showing tissue-specific gene expression patterns in *T. govanianum*; (a) UGTs and (b) CYP450.

**Supplementary Figure S2:** Correlation analysis between qRT-PCR and RNA-seq data of steroidal saponin biosynthesis pathway genes using log<sub>2</sub> FC.

## Supplementary Table Titles

**Supplementary Table S1:** Summary of *de novo* assembly generated from *T. govanianum*.

**Supplementary Table S2:** Functional annotation of *T. govanianum* transcripts with various public databases. **(Submitted as Supplementary dataset)**

**Supplementary Table S3:** Classification and number of transcripts related to transcription factors families.

**Supplementary Table S4:** CYPs Classification: Details of CYPs family, sub-family, genes and contig IDs. **(Submitted as Supplementary dataset)**

**Supplementary Table S5:** Global and tissue specific expression of cytochrome P450s (CYPs, s.no. 1), uridine diphosphate-glycosyltransferases (UGTs, s.no. 2), secondary metabolite biosynthesis pathways (s.no. 3) and steroidal saponin biosynthesis pathway (s.no. 4) in *T. govanianum*. Tissue wise expression of different categories was depicted with green colour (Leaf), Stem (Blue), Rhizome (yellow), Fruit (red). **(Submitted as Supplementary dataset)**

**Supplementary Table S6.** Pathways and number of transcripts related to secondary metabolite biosynthesis in *T. govanianum*.

**Supplementary Table S7:** List of expression primer sets of selected transcripts used for Real time-PCR analysis.

**Supplementary Table S8:** The number of transcripts related to Steroidal Saponin biosynthesis.
